# Supplementary material for: Effect of acidity/alkalinity of deep eutectic solvents on the extraction profiles of phenolics and biomolecules in defatted rice bran extract
Source: PeerJ journal article supplement (doi:10.7717/peerj-achem.29), 2024-01-03
Supplement: Raw_data_Biomolecues.xlsx [file Raw_data_Biomolecues.xlsx]

## Sheet: Phenolic content
Fig 2. Impact of DES type on phenolic compounds contribution and Table 4 (total phenolic content)
Total phenolic content	ChCl:La	ChCl:Gly	ChCl:U	K:Gly
Rep1	3.968	3.392	2.584	5.152
Rep2	4.592	3.712	2.968	5.808
Rep3	4.44	3.264	2.872	5.52
ADV	4.33333	3.456	2.808	5.49333
SD	0.325388	0.230755	0.19984	0.328812
Free	ChCl:La	ChCl:Gly	ChCl:U	K:Gly
Rep1	0.44	0.296	0.2	1.848
Rep2	0.424	0.224	0.232	1.792
Rep3	0.52	0.224	0.152	1.8
ADV	0.461333	0.248	0.194667	1.81333
SD	0.0514328	0.0415692	0.0402658	0.0302875
Soluble esterified bound phenolics	ChCl:La	ChCl:Gly	ChCl:U	K:Gly
Rep1	1.312	1.208	0.952	1.312
Rep2	1.872	1.392	1.072	1.944
Rep3	1.632	1.288	1.016	1.752
ADV	1.60533	1.296	1.01333	1.66933
SD	0.280951	0.0922605	0.0600444	0.324008
Soluble glycosylated bound phenolics	ChCl:La	ChCl:Gly	ChCl:U	K:Gly
Rep1	2.216	1.888	1.432	1.992
Rep2	2.296	2.096	1.664	2.072
Rep3	2.288	1.752	1.704	1.968
ADV	2.26667	1.912	1.6	2.01067
SD	0.0440606	0.173251	0.14686	0.0544549

## Sheet: Stat result for PC
Total Phenolic acid
Descriptives
Total Phenolic Content
	N	Mean	Std. Deviation	Std. Error	95% Confidence Interval for Mean		Minimum	Maximum
					Lower Bound	Upper Bound
ChCl:La	3	4.3333	0.32347	0.18676	3.5298	5.1369	3.97	4.59
ChCl:Gly	3	3.4533	0.23159	0.13371	2.878	4.0286	3.26	3.71
ChCl:U	3	2.8067	0.20257	0.11695	2.3035	3.3099	2.58	2.97
K:Gly	3	5.4933	0.33081	0.19099	4.6716	6.3151	5.15	5.81
Total	12	4.0217	1.07889	0.31145	3.3362	4.7072	2.58	5.81
ANOVA
Total Phenolic Content
	Sum of Squares	df	Mean Square	F	Sig.
Between Groups	12.187	3	4.062	52.63	0
Within Groups	0.617	8	0.077
Total	12.804	11
Post Hoc Tests
Multiple Comparisons
Dependent Variable:	Total Phenolic Content
Tukey HSD
(I) type		Mean Difference (I-J)	Std. Error	Sig.	95% Confidence Interval
					Lower Bound	Upper Bound
ChCl:La	ChCl:Gly	.88000*	0.22684	0.02	0.1536	1.6064
	ChCl:U	1.52667*	0.22684	0.001	0.8003	2.2531
	K:Gly	-1.16000*	0.22684	0.004	-1.8864	-0.4336
ChCl:Gly	ChCl:La	-.88000*	0.22684	0.02	-1.6064	-0.1536
	ChCl:U	0.64667	0.22684	0.082	-0.0797	1.3731
	K:Gly	-2.04000*	0.22684	0	-2.7664	-1.3136
ChCl:U	ChCl:La	-1.52667*	0.22684	0.001	-2.2531	-0.8003
	ChCl:Gly	-0.64667	0.22684	0.082	-1.3731	0.0797
	K:Gly	-2.68667*	0.22684	0	-3.4131	-1.9603
K:Gly	ChCl:La	1.16000*	0.22684	0.004	0.4336	1.8864
	ChCl:Gly	2.04000*	0.22684	0	1.3136	2.7664
	ChCl:U	2.68667*	0.22684	0	1.9603	3.4131
*. The mean difference is significant at the 0.05 level.
Homogeneous Subsets
Total Phenolic Content
Tukey HSDa
type	N	Subset for alpha = 0.05
		1	2	3
ChCl:U	3	2.8067
ChCl:Gly	3	3.4533
ChCl:La	3		4.3333
K:Gly	3			5.4933
Sig.		0.082	1	1
Means for groups in homogeneous subsets are displayed.
a. Uses Harmonic Mean Sample Size = 3.000.
Free
Descriptives
Free
	N	Mean	Std. Deviation	Std. Error	95% Confidence Interval for Mean		Minimum	Maximum
					Lower Bound	Upper Bound
ChCl:La	3	0.46	0.05292	0.03055	0.3286	0.5914	0.42	0.52
ChCl:Gly	3	0.2467	0.04619	0.02667	0.1319	0.3614	0.22	0.3
ChCl:U	3	0.1933	0.04041	0.02333	0.0929	0.2937	0.15	0.23
K:Gly	3	1.8133	0.03215	0.01856	1.7335	1.8932	1.79	1.85
Total	12	0.6783	0.69332	0.20014	0.2378	1.1188	0.15	1.85
ANOVA
Free
	Sum of Squares	df	Mean Square	F	Sig.
Between Groups	5.272	3	1.757	924.977	0
Within Groups	0.015	8	0.002
Total	5.288	11
Post Hoc Tests
Multiple Comparisons
Dependent Variable:	Free
Tukey HSD
(I) type		Mean Difference (I-J)	Std. Error	Sig.	95% Confidence Interval
					Lower Bound	Upper Bound
ChCl:La	ChCl:Gly	.21333*	0.03559	0.001	0.0994	0.3273
	ChCl:U	.26667*	0.03559	0	0.1527	0.3806
	K:Gly	-1.35333*	0.03559	0	-1.4673	-1.2394
ChCl:Gly	ChCl:La	-.21333*	0.03559	0.001	-0.3273	-0.0994
	ChCl:U	0.05333	0.03559	0.481	-0.0606	0.1673
	K:Gly	-1.56667*	0.03559	0	-1.6806	-1.4527
ChCl:U	ChCl:La	-.26667*	0.03559	0	-0.3806	-0.1527
	ChCl:Gly	-0.05333	0.03559	0.481	-0.1673	0.0606
	K:Gly	-1.62000*	0.03559	0	-1.734	-1.506
K:Gly	ChCl:La	1.35333*	0.03559	0	1.2394	1.4673
	ChCl:Gly	1.56667*	0.03559	0	1.4527	1.6806
	ChCl:U	1.62000*	0.03559	0	1.506	1.734
*. The mean difference is significant at the 0.05 level.
Homogeneous Subsets
Free
Tukey HSDa
type	N	Subset for alpha = 0.05
		1	2	3
ChCl:U	3	0.1933
ChCl:Gly	3	0.2467
ChCl:La	3		0.46
K:Gly	3			1.8133
Sig.		0.481	1	1
Means for groups in homogeneous subsets are displayed.
a. Uses Harmonic Mean Sample Size = 3.000.
Soluble esterified bound phenolics
Descriptives
Soluble esterified bound phenolics
	N	Mean	Std. Deviation	Std. Error	95% Confidence Interval for Mean		Minimum	Maximum
					Lower Bound	Upper Bound
ChCl:La	3	1.6033	0.28095	0.16221	0.9054	2.3013	1.31	1.87
ChCl:Gly	3	1.2967	0.09018	0.05207	1.0726	1.5207	1.21	1.39
ChCl:U	3	1.0133	0.06028	0.0348	0.8636	1.1631	0.95	1.07
K:Gly	3	1.6667	0.32316	0.18658	0.8639	2.4694	1.31	1.94
Total	12	1.395	0.33137	0.09566	1.1845	1.6055	0.95	1.94
ANOVA
Soluble esterified bound phenolics
	Sum of Squares	df	Mean Square	F	Sig.
Between Groups	0.818	3	0.273	5.587	0.023
Within Groups	0.39	8	0.049
Total	1.208	11
Post Hoc Tests
Multiple Comparisons
Dependent Variable:	Soluble esterified bound phenolics
Tukey HSD
(I) type		Mean Difference (I-J)	Std. Error	Sig.	95% Confidence Interval
					Lower Bound	Upper Bound
ChCl:La	ChCl:Gly	0.30667	0.18034	0.383	-0.2708	0.8842
	ChCl:U	.59000*	0.18034	0.045	0.0125	1.1675
	K:Gly	-0.06333	0.18034	0.984	-0.6408	0.5142
ChCl:Gly	ChCl:La	-0.30667	0.18034	0.383	-0.8842	0.2708
	ChCl:U	0.28333	0.18034	0.444	-0.2942	0.8608
	K:Gly	-0.37	0.18034	0.247	-0.9475	0.2075
ChCl:U	ChCl:La	-.59000*	0.18034	0.045	-1.1675	-0.0125
	ChCl:Gly	-0.28333	0.18034	0.444	-0.8608	0.2942
	K:Gly	-.65333*	0.18034	0.028	-1.2308	-0.0758
K:Gly	ChCl:La	0.06333	0.18034	0.984	-0.5142	0.6408
	ChCl:Gly	0.37	0.18034	0.247	-0.2075	0.9475
	ChCl:U	.65333*	0.18034	0.028	0.0758	1.2308
*. The mean difference is significant at the 0.05 level.
Homogeneous Subsets
Soluble esterified bound phenolics
Tukey HSDa
type	N	Subset for alpha = 0.05
		1	2
ChCl:U	3	1.0133
ChCl:Gly	3	1.2967	1.2967
ChCl:La	3		1.6033
K:Gly	3		1.6667
Sig.		0.444	0.247
Means for groups in homogeneous subsets are displayed.
a. Uses Harmonic Mean Sample Size = 3.000.
Soluble glycosylated bound phenolics
Descriptives
Soluble glycosylated bound phenolics
	N	Mean	Std. Deviation	Std. Error	95% Confidence Interval for Mean		Minimum	Maximum
					Lower Bound	Upper Bound
ChCl:La	3	2.27	0.04359	0.02517	2.1617	2.3783	2.22	2.3
ChCl:Gly	3	1.9133	0.17616	0.10171	1.4757	2.3509	1.75	2.1
ChCl:U	3	1.5967	0.14572	0.08413	1.2347	1.9586	1.43	1.7
K:Gly	3	2.01	0.05292	0.03055	1.8786	2.1414	1.97	2.07
Total	12	1.9475	0.27143	0.07836	1.775	2.12	1.43	2.3
ANOVA
Soluble glycosylated bound phenolics
	Sum of Squares	df	Mean Square	F	Sig.
Between Groups	0.696	3	0.232	16.302	0.001
Within Groups	0.114	8	0.014
Total	0.81	11
Post Hoc Tests
Multiple Comparisons
Dependent Variable:	Soluble glycosylated bound phenolics
Tukey HSD
(I) type		Mean Difference (I-J)	Std. Error	Sig.	95% Confidence Interval
					Lower Bound	Upper Bound
ChCl:La	ChCl:Gly	.35667*	0.09744	0.026	0.0446	0.6687
	ChCl:U	.67333*	0.09744	0.001	0.3613	0.9854
	K:Gly	0.26	0.09744	0.106	-0.052	0.572
ChCl:Gly	ChCl:La	-.35667*	0.09744	0.026	-0.6687	-0.0446
	ChCl:U	.31667*	0.09744	0.047	0.0046	0.6287
	K:Gly	-0.09667	0.09744	0.758	-0.4087	0.2154
ChCl:U	ChCl:La	-.67333*	0.09744	0.001	-0.9854	-0.3613
	ChCl:Gly	-.31667*	0.09744	0.047	-0.6287	-0.0046
	K:Gly	-.41333*	0.09744	0.012	-0.7254	-0.1013
K:Gly	ChCl:La	-0.26	0.09744	0.106	-0.572	0.052
	ChCl:Gly	0.09667	0.09744	0.758	-0.2154	0.4087
	ChCl:U	.41333*	0.09744	0.012	0.1013	0.7254
*. The mean difference is significant at the 0.05 level.
Homogeneous Subsets
Soluble glycosylated bound phenolics
Tukey HSDa
type	N	Subset for alpha = 0.05
		1	2	3
ChCl:U	3	1.5967
ChCl:Gly	3		1.9133
K:Gly	3		2.01	2.01
ChCl:La	3			2.27
Sig.		1	0.758	0.106
Means for groups in homogeneous subsets are displayed.
a. Uses Harmonic Mean Sample Size = 3.000.

## Sheet: Protein
Table 4. Protein content
Type	mg/g			adv	sd
	1	2	3
ChCl:La	5.88556	5.90778	6.09667	5.96333	0.116003
ChCl:G	6.19	5.92333	6.54	6.21778	0.30927
ChCl:U	7.70143	7.13	7.53	7.45381	0.293234
K:Gly	12.9323	12.8708	12.64	12.8144	0.154102

## Sheet: Stat result for protein
Descriptives
protein
	N	Mean	Std. Deviation	Std. Error	95% Confidence Interval for Mean		Minimum	Maximum
					Lower Bound	Upper Bound
ChCl:La	3	5.9667	0.1159	0.06692	5.6787	6.2546	5.89	6.1
ChCl:G	3	6.2167	0.31086	0.17947	5.4445	6.9889	5.92	6.54
ChCl:U	3	7.4533	0.29263	0.16895	6.7264	8.1803	7.13	7.7
K:Gly	3	12.8133	0.15308	0.08838	12.4331	13.1936	12.64	12.93
Total	12	8.1125	2.90191	0.83771	6.2687	9.9563	5.89	12.93
ANOVA
protein
	Sum of Squares	df	Mean Square	F	Sig.
Between Groups	92.193	3	30.731	560.957	0
Within Groups	0.438	8	0.055
Total	92.632	11
Post Hoc Tests
Multiple Comparisons
Dependent Variable:	protein
Tukey HSD
(I) type		Mean Difference (I-J)	Std. Error	Sig.	95% Confidence Interval
					Lower Bound	Upper Bound
ChCl:La	ChCl:G	-0.25	0.19111	0.583	-0.862	0.362
	ChCl:U	-1.48667*	0.19111	0	-2.0987	-0.8747
	K:Gly	-6.84667*	0.19111	0	-7.4587	-6.2347
ChCl:G	ChCl:La	0.25	0.19111	0.583	-0.362	0.862
	ChCl:U	-1.23667*	0.19111	0.001	-1.8487	-0.6247
	K:Gly	-6.59667*	0.19111	0	-7.2087	-5.9847
ChCl:U	ChCl:La	1.48667*	0.19111	0	0.8747	2.0987
	ChCl:G	1.23667*	0.19111	0.001	0.6247	1.8487
	K:Gly	-5.36000*	0.19111	0	-5.972	-4.748
K:Gly	ChCl:La	6.84667*	0.19111	0	6.2347	7.4587
	ChCl:G	6.59667*	0.19111	0	5.9847	7.2087
	ChCl:U	5.36000*	0.19111	0	4.748	5.972
*. The mean difference is significant at the 0.05 level.
Homogeneous Subsets
protein
Tukey HSDa
type	N	Subset for alpha = 0.05
		1	2	3
ChCl:La	3	5.9667
ChCl:G	3	6.2167
ChCl:U	3		7.4533
K:Gly	3			12.8133
Sig.		0.583	1	1
Means for groups in homogeneous subsets are displayed.
a. Uses Harmonic Mean Sample Size = 3.000.

## Sheet: Phytic acid
Table 4. Phytic acid content
Type	mg/g			adv	sd
	1	2	3
ChCl:La	45.5862	55.931	49.3793	50.2989	5.23336
ChCl:G	0.216552	0.126897	0.264828	0.202759	0.0699924
ChCl:U	0.126897	0.0717241	0.0993103	0.0993103	0.0275862
K:Gly	1.06	1.02	1.04	1.04	0.02

## Sheet: Stat result for phytic acid
Descriptives
PhyticAcid
	N	Mean	Std. Deviation	Std. Error	95% Confidence Interval for Mean		Minimum	Maximum
					Lower Bound	Upper Bound
ChCl:La	3	50.3	5.23103	3.02014	37.3054	63.2946	45.59	55.93
ChCl:G	3	0.2033	0.06658	0.03844	0.0379	0.3687	0.13	0.26
ChCl:U	3	0.1	0.03	0.01732	0.0255	0.1745	0.07	0.13
K:Gly	3	1.04	0.02	0.01155	0.9903	1.0897	1.02	1.06
Total	12	12.9108	22.6598	6.54132	-1.4865	27.3082	0.07	55.93
ANOVA
PhyticAcid
	Sum of Squares	df	Mean Square	F	Sig.
Between Groups	5593.39	3	1864.46	272.489	0
Within Groups	54.739	8	6.842
Total	5648.13	11
Post Hoc Tests
Multiple Comparisons
Dependent Variable:	PhyticAcid
Tukey HSD
(I) type		Mean Difference (I-J)	Std. Error	Sig.	95% Confidence Interval
					Lower Bound	Upper Bound
ChCl:La	ChCl:G	50.09667*	2.13578	0	43.2571	56.9362
	ChCl:U	50.20000*	2.13578	0	43.3605	57.0395
	K:Gly	49.26000*	2.13578	0	42.4205	56.0995
ChCl:G	ChCl:La	-50.09667*	2.13578	0	-56.9362	-43.2571
	ChCl:U	0.10333	2.13578	1	-6.7362	6.9429
	K:Gly	-0.83667	2.13578	0.978	-7.6762	6.0029
ChCl:U	ChCl:La	-50.20000*	2.13578	0	-57.0395	-43.3605
	ChCl:G	-0.10333	2.13578	1	-6.9429	6.7362
	K:Gly	-0.94	2.13578	0.97	-7.7795	5.8995
K:Gly	ChCl:La	-49.26000*	2.13578	0	-56.0995	-42.4205
	ChCl:G	0.83667	2.13578	0.978	-6.0029	7.6762
	ChCl:U	0.94	2.13578	0.97	-5.8995	7.7795
*. The mean difference is significant at the 0.05 level.
Homogeneous Subsets
PhyticAcid
Tukey HSDa
type	N	Subset for alpha = 0.05
		1	2
ChCl:U	3	0.1
ChCl:G	3	0.2033
K:Gly	3	1.04
ChCl:La	3		50.3
Sig.		0.97	1
Means for groups in homogeneous subsets are displayed.
a. Uses Harmonic Mean Sample Size = 3.000.

## Sheet: Sugar
Table 4. Reducing sugar
Type	mg/g			adv	sd
	1	2	3
ChCl:La	58.18	59.18	53.781	57.047	2.87229
ChCl:G	1.677	1.462	1.891	1.67667	0.2145
ChCl:U	8.12	7.053	6.92	7.36433	0.657797
K:Gly	2.312	2.185	2.335	2.27733	0.0807857

## Sheet: Stat results for sugar
Descriptives
ReducingSugar
	N	Mean	Std. Deviation	Std. Error	95% Confidence Interval for Mean		Minimum	Maximum
					Lower Bound	Upper Bound
ChCl:La	3	57.0467	2.87286	1.65865	49.9101	64.1833	53.78	59.18
ChCl:G	3	1.6767	0.21502	0.12414	1.1425	2.2108	1.46	1.89
ChCl:U	3	7.3633	0.65851	0.38019	5.7275	8.9992	6.92	8.12
K:Gly	3	2.28	0.07937	0.04583	2.0828	2.4772	2.19	2.34
Total	12	17.0917	24.2368	6.99655	1.6924	32.491	1.46	59.18
ANOVA
ReducingSugar
	Sum of Squares	df	Mean Square	F	Sig.
Between Groups	6444.15	3	2148.05	983.146	0
Within Groups	17.479	8	2.185
Total	6461.63	11
Post Hoc Tests
Multiple Comparisons
Dependent Variable:	ReducingSugar
Tukey HSD
(I) type		Mean Difference (I-J)	Std. Error	Sig.	95% Confidence Interval
					Lower Bound	Upper Bound
ChCl:La	ChCl:G	55.37000*	1.20689	0	51.5051	59.2349
	ChCl:U	49.68333*	1.20689	0	45.8184	53.5482
	K:Gly	54.76667*	1.20689	0	50.9018	58.6316
ChCl:G	ChCl:La	-55.37000*	1.20689	0	-59.2349	-51.5051
	ChCl:U	-5.68667*	1.20689	0.007	-9.5516	-1.8218
	K:Gly	-0.60333	1.20689	0.957	-4.4682	3.2616
ChCl:U	ChCl:La	-49.68333*	1.20689	0	-53.5482	-45.8184
	ChCl:G	5.68667*	1.20689	0.007	1.8218	9.5516
	K:Gly	5.08333*	1.20689	0.013	1.2184	8.9482
K:Gly	ChCl:La	-54.76667*	1.20689	0	-58.6316	-50.9018
	ChCl:G	0.60333	1.20689	0.957	-3.2616	4.4682
	ChCl:U	-5.08333*	1.20689	0.013	-8.9482	-1.2184
*. The mean difference is significant at the 0.05 level.
Homogeneous Subsets
ReducingSugar
Tukey HSDa
type	N	Subset for alpha = 0.05
		1	2	3
ChCl:G	3	1.6767
K:Gly	3	2.28
ChCl:U	3		7.3633
ChCl:La	3			57.0467
Sig.		0.957	1	1
Means for groups in homogeneous subsets are displayed.
a. Uses Harmonic Mean Sample Size = 3.000.
