# Supplementary material for: Effect of acidity/alkalinity of deep eutectic solvents on the extraction profiles of phenolics and biomolecules in defatted rice bran extract
Source: PeerJ journal article supplement (doi:10.7717/peerj-achem.29), 2024-01-03
Supplement: Raw_data_DES.xlsx [file Raw_data_DES.xlsx]

## Sheet: pH
Table 3. pH properties of DES
Type	Rep			adv	sd
	1	2	3
ChCl:La	0.43	0.42	0.42	0.423333	0.0057735
ChCl:G	4.72	4.71	4.72	4.71667	0.0057735
ChCl:U	8.39	8.42	8.43	8.41333	0.0208167
K:Gly	11.21	11.2	11.21	11.2067	0.0057735

## Sheet: Polarity
Table 3. Polarity properties of DES
Type	Replication			adv	sd
	1	2	3
ChCl:La	47.731	47.73	47.73	47.7303	0.00057735
ChCl:G	49.041	49.041	49.049	49.0437	0.0046188
ChCl:U	49.637	49.637	49.637	49.637	0
K:Gly	49.984	49.984	49.984	49.984	0
