# Supplementary material for: Effect of acidity/alkalinity of deep eutectic solvents on the extraction profiles of phenolics and biomolecules in defatted rice bran extract
Source: PeerJ journal article supplement (doi:10.7717/peerj-achem.29), 2024-01-03
Supplement: Raw_data_DPPH_ABTS.xlsx [file Raw_data_DPPH_ABTS.xlsx]

## Sheet: DPPH
Table 5 Antioxidant activities of DES extracts (DPPH)
Rep 1	DES Type
	ChCl:La	ChCl:G	ChCl:U	K:Gly
FPC	0.499064	0.0966555	0.131648	4.41492
SEBPC	3.14405	0.87604	0.0548628	3.76971
SGBPC	4.57134	2.98764	1.63856	5.90086
TPC	8.21446	3.96033	1.82507	14.0855
Rep 2	DES Type
	ChCl:La	ChCl:G	ChCl:U	K:Gly
FPC	0.446576	0.184136	0.0791595	3.94568
SEBPC	2.57705	1.57991	1.09111	5.37296
SGBPC	4.76686	3.92613	2.04915	7.52367
TPC	7.79048	5.69017	3.21942	16.8423
Rep 3	DES Type
	ChCl:La	ChCl:G	ChCl:U	K:Gly
FPC	0.761505	0.0616634	0.0616634	3.69151
SEBPC	2.26422	0.797833	0.406796	5.17745
SGBPC	4.78641	3.98478	2.20557	7.26949
TPC	7.81213	4.84428	2.67402	16.1384
ADV	DES Type
	ChCl:La	ChCl:G	ChCl:U	K:Gly
FPC	0.569048	0.114152	0.0908235	4.01737
SEBPC	2.66177	1.08459	0.51759	4.77337
SGBPC	4.7082	3.63285	1.96443	6.89801
TPC	7.93902	4.83159	2.57284	15.6888
SD	DES Type
	ChCl:La	ChCl:G	ChCl:U	K:Gly
FPC	0.168726	0.0630829	0.0364209	0.366999
SEBPC	0.445993	0.430733	0.526933	0.874676
SGBPC	0.118929	0.559538	0.292843	0.872853
TPC	0.238776	0.864987	0.70266	1.43236

## Sheet: ABTS
Table 5 Antioxidant activities of DES extracts (ABTS)
Rep 1	DES Type
	ChCl:La	ChCl:G	ChCl:U	K:Gly
FPC	1.07134	1.04203	1.44069	13.5991
SEBPC	3.07331	9.4059	3.67234	4.84729
SGBPC	18.3058	10.3472	5.20401	10.0049
TPC		20.7952	10.317	28.4513
Rep 2	DES Type
	ChCl:La	ChCl:G	ChCl:U	K:Gly
FPC	1.12997	1.39379	1.05961	11.745
SEBPC	2.81658	9.7482	5.2127	7.6362
SGBPC	19.675	8.20784	5.82016	7.60881
TPC	23.6215	19.3498	12.0925	26.99
Rep 3	DES Type
	ChCl:La	ChCl:G	ChCl:U	K:Gly
FPC	1.07134	1.04789	1.01271	12.0587
SEBPC	4.69925	6.06845	3.15889	7.24705
SGBPC	15.7385	10.604	5.20401	9.23475
TPC	21.5091	17.7203	9.37561	28.5405
ADV	DES Type
	ChCl:La	ChCl:G	ChCl:U	K:Gly
FPC	1.09088	1.16124	1.17101	12.4676
SEBPC	3.52971	8.40752	4.01464	6.57684
SGBPC	17.9064	9.71968	5.40939	8.9495
TPC	22.5653	19.2884	10.595	27.9939
SD	DES Type
	ChCl:La	ChCl:G	ChCl:U	K:Gly
FPC	0.0338488	0.201422	0.234731	0.992386
SEBPC	1.02095	2.03291	1.06884	1.51042
SGBPC	1.99839	1.31556	0.355737	1.22326
TPC	1.49372	1.53835	1.3796	0.870605
