# Supplementary material for: Effect of acidity/alkalinity of deep eutectic solvents on the extraction profiles of phenolics and biomolecules in defatted rice bran extract
Source: PeerJ journal article supplement (doi:10.7717/peerj-achem.29), 2024-01-03
Supplement: Raw_data_Phenolic_composition.xlsx [file Raw_data_Phenolic_composition.xlsx]

## Sheet: Free
Figure 3 Compositions of phenolic compounds [free phenolic compounds (FPC)]
	REP 1	%w/w
	DES TYPE	4-hydroxybenzoic acid	Vanillic acid	p-coumaric acid	Ferulic acid	Syringic acid	Sinapic acid	Caffeic acid	Total
	ChCl:La	2.65704	12.3259	38.6697	42.5809	0	3.76637	0	100
	ChCl:Gly	1.7689	5.81561	44.0439	48.3716	0	0	0	100
	ChCl:U	0	0	54.1309	45.8691	0	0	0	100
	K:Gly	0.52778	0.547579	22.4061	76.5186	0	0	0	100
	REP 2	%w/w
	DES TYPE	4-hydroxybenzoic acid	Vanillic acid	p-coumaric acid	Ferulic acid	Syringic acid	Sinapic acid	Caffeic acid	Total
	ChCl:La	1.34804	9.56557	30.6287	56.0338	0	2.42394	0	100
	ChCl:Gly	1.81167	4.47309	31.3071	62.4081	0	0	0	100
	ChCl:U	1.2959	4.06888	37.5965	57.0387	0	0	0	100
	K:Gly	0.512391	0.724467	22.8507	75.9124	0	0	0	100
	REP 3	%w/w
	DES TYPE	4-hydroxybenzoic acid	Vanillic acid	p-coumaric acid	Ferulic acid	Syringic acid	Sinapic acid	Caffeic acid	Total
	ChCl:La	1.64208	9.39807	29.817	56.5394	0	2.60349	0	100
	ChCl:Gly	1.53527	4.30441	31.3117	62.8486	0	0	0	100
	ChCl:U	0.698362	2.19272	38.7882	58.3207	0	0	0	100
	K:Gly	0.519806	0.639238	22.6365	76.2045	0	0	0	100
	ADV	%w/w
	DES TYPE	4-hydroxybenzoic acid	Vanillic acid	p-coumaric acid	Ferulic acid	Syringic acid	Sinapic acid	Caffeic acid	Total
	ChCl:La	1.88239	10.4299	33.0385	51.718	0	2.93127	0	100
	ChCl:Gly	1.70528	4.86437	35.5542	57.8761	0	0	0	100
	ChCl:U	0.664754	2.0872	43.5052	53.7429	0	0	0	100
	K:Gly	0.519992	0.637095	22.6311	76.2118	0	0	0	100
	SD	%w/w
	DES TYPE	4-hydroxybenzoic acid	Vanillic acid	p-coumaric acid	Ferulic acid	Syringic acid	Sinapic acid	Caffeic acid
	ChCl:La	0.560762	1.34246	3.99567	6.46419	0	0.595042	0
	ChCl:Gly	0.121477	0.676144	6.00308	6.7231	0	0	0
	ChCl:U	0.529582	1.66279	7.52922	5.59211	0	0	0
	K:Gly	0.00628408	0.0722303	0.18156	0.247506	0	0	0

## Sheet: SEBPC
Figure 3 Compositions of phenolic compounds [Soluble esterified bound phenolic compounds (SEBPC)]
	REP 1	%w/w							Total
	DES TYPE	4-hydroxybenzoic acid	Vanillic acid	p-coumaric acid	Ferulic acid	Syringic acid	Sinapic acid	Caffeic acid
	ChCl:La	1.60276	0.483729	1.47343	75.1341	0	21.3059	0	100
	ChCl:Gly	1.63615	2.00013	1.83695	44.7857	0	49.741	0	100
	ChCl:U	1.78237	1.82465	3.43146	65.8845	0	27.077	0	100
	K:Gly	0.83375	2.78218	21.2428	75.1413	0	0	0	100
	REP 2	%w/w							Total
	DES TYPE	4-hydroxybenzoic acid	Vanillic acid	p-coumaric acid	Ferulic acid	Syringic acid	Sinapic acid	Caffeic acid
	ChCl:La	1.4278	0.906025	2.35004	74.9546	0	20.3616	0	100
	ChCl:Gly	1.47492	2.02428	3.20429	49.4355	0	43.861	0	100
	ChCl:U	1.6238	1.94622	3.41283	66.2197	0	26.7975	0	100
	K:Gly	1.32714	4.66221	20.249	73.7616	0	0	0	100
	REP 3	%w/w							Total
	DES TYPE	4-hydroxybenzoic acid	Vanillic acid	p-coumaric acid	Ferulic acid	Syringic acid	Sinapic acid	Caffeic acid
	ChCl:La	1.51169	0.703532	1.9297	75.0407	0	20.8144	0	100
	ChCl:Gly	1.55861	2.01175	2.49451	47.0218	0	46.9133	0	100
	ChCl:U	1.70787	1.88177	3.42271	66.042	0	26.9457	0	100
	K:Gly	1.09148	3.76425	20.7237	74.4206	0	0	0	100
	ADV	%w/w							Total
	DES TYPE	4-hydroxybenzoic acid	Vanillic acid	p-coumaric acid	Ferulic acid	Syringic acid	Sinapic acid	Caffeic acid
	ChCl:La	1.51408	0.697762	1.91772	75.0431	0	20.8273	0	100
	ChCl:Gly	1.55656	2.01205	2.51192	47.081	0	46.8385	0	100
	ChCl:U	1.70468	1.88421	3.42233	66.0487	0	26.94	0	100
	K:Gly	1.08413	3.73621	20.7385	74.4412	0	0	0	100
	SD	%w/w
	DES TYPE	4-hydroxybenzoic acid	Vanillic acid	p-coumaric acid	Ferulic acid	Syringic acid	Sinapic acid	Caffeic acid
	ChCl:La	0.0875078	0.211207	0.438427	0.0898113	0	0.472315	0
	ChCl:Gly	0.0806368	0.012075	0.683838	2.32546	0	2.94074	0
	ChCl:U	0.0793345	0.0608225	0.0093196	0.167674	0	0.139842	0
	K:Gly	0.246779	0.940329	0.497063	0.690046	0	0	0

## Sheet: SGBPC
Figure 3 Compositions of phenolic compounds [Soluble glycosylated bound phenolic compounds (SGBPC)
	REP 1	%w/w
	DES TYPE	4-hydroxybenzoic acid	Vanillic acid	p-coumaric acid	Ferulic acid	Syringic acid	Sinapic acid	Caffeic acid	Total
	ChCl:La	4.4329	15.7093	2.27776	64.4819	0	13.0981	0	100
	ChCl:Gly	3.00892	10.92	2.33384	63.9574	0	19.7798	0	100
	ChCl:U	2.1999	9.79717	3.03961	65.6161	0	19.3473	0	100
	K:Gly	5.74366	9.28311	4.90057	68.7789	0	11.2938	0	100
	REP 2	%w/w
	DES TYPE	4-hydroxybenzoic acid	Vanillic acid	p-coumaric acid	Ferulic acid	Syringic acid	Sinapic acid	Caffeic acid	Total
	ChCl:La	4.94033	14.584	2.01661	62.896	0	15.563	0	100
	ChCl:Gly	2.8908	9.8557	2.39773	62.6564	0	22.1993	0	100
	ChCl:U	2.21919	9.80823	3.21212	65.9046	0	18.8558	0	100
	K:Gly	5.68551	8.71922	4.61154	69.5427	0	11.441	0	100
	REP 3	%w/w
	DES TYPE	4-hydroxybenzoic acid	Vanillic acid	p-coumaric acid	Ferulic acid	Syringic acid	Sinapic acid	Caffeic acid	Total
	ChCl:La	4.71061	15.0935	2.13484	63.614	0	14.447	0	100
	ChCl:Gly	2.94757	10.3673	2.36702	63.2818	0	21.0364	0	100
	ChCl:U	2.21006	9.80299	3.13042	65.7679	0	19.0886	0	100
	K:Gly	5.71299	8.98566	4.74811	69.1818	0	11.3714	0	100
	ADV	%w/w
	DES TYPE	4-hydroxybenzoic acid	Vanillic acid	p-coumaric acid	Ferulic acid	Syringic acid	Sinapic acid	Caffeic acid	Total
	ChCl:La	4.69461	15.1289	2.14307	63.664	0	14.3694	0	100
	ChCl:Gly	2.9491	10.381	2.3662	63.2986	0	21.0051	0	100
	ChCl:U	2.20972	9.8028	3.12738	65.7629	0	19.0972	0	100
	K:Gly	5.71405	8.996	4.75341	69.1678	0	11.3687	0	100
	SD	%w/w
	DES TYPE	4-hydroxybenzoic acid	Vanillic acid	p-coumaric acid	Ferulic acid	Syringic acid	Sinapic acid	Caffeic acid
	ChCl:La	0.207464	0.460092	0.10677	0.648407	0	1.0078	0
	ChCl:Gly	0.0482361	0.434622	0.0260917	0.531267	0	0.988034	0
	ChCl:U	0.00787987	0.00451891	0.0704618	0.117849	0	0.200709	0
	K:Gly	0.0237492	0.230322	0.118053	0.311992	0	0.0601327	0
