# Supplementary figures and images for: Effect of acidity/alkalinity of deep eutectic solvents on the extraction profiles of phenolics and biomolecules in defatted rice bran extract
Source: PeerJ journal article supplement (doi:10.7717/peerj-achem.29), 2024-01-03

UV Spectrum

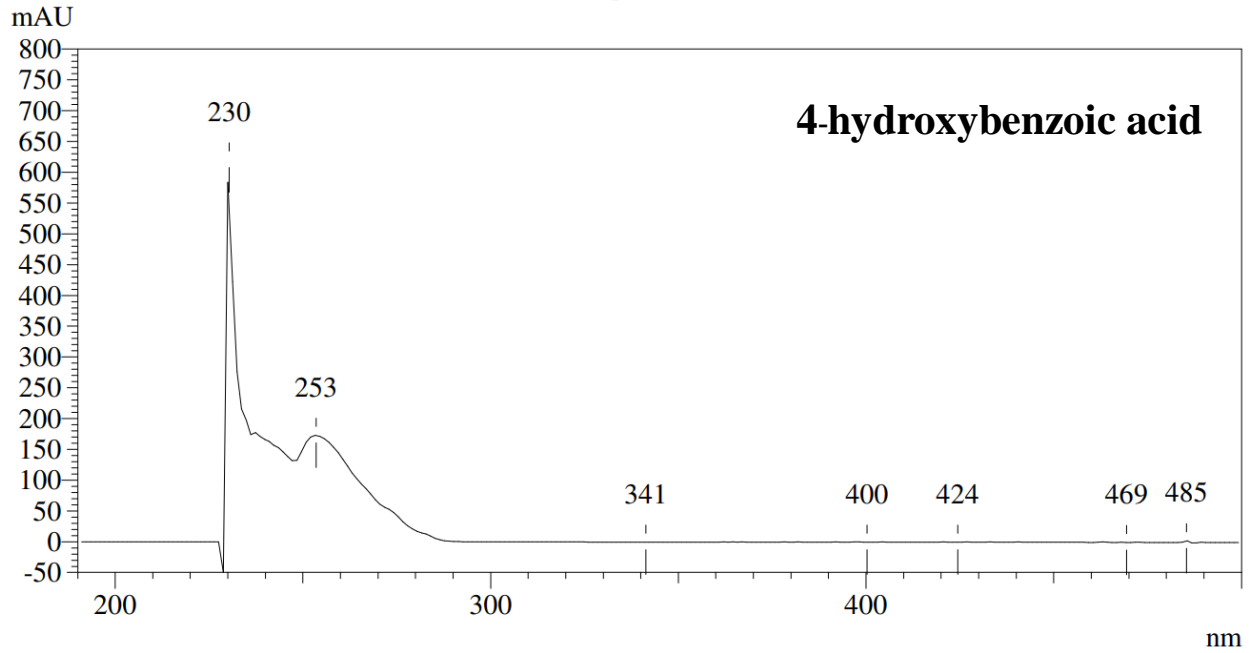

UV Spectrum

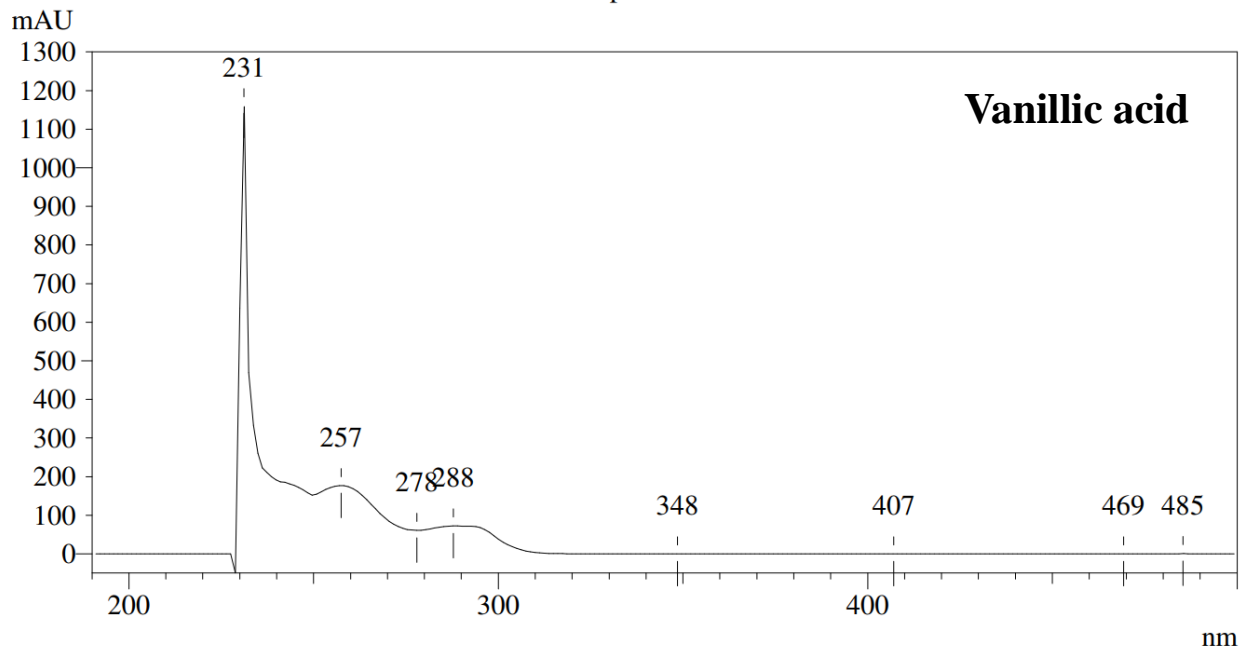

UV Spectrum

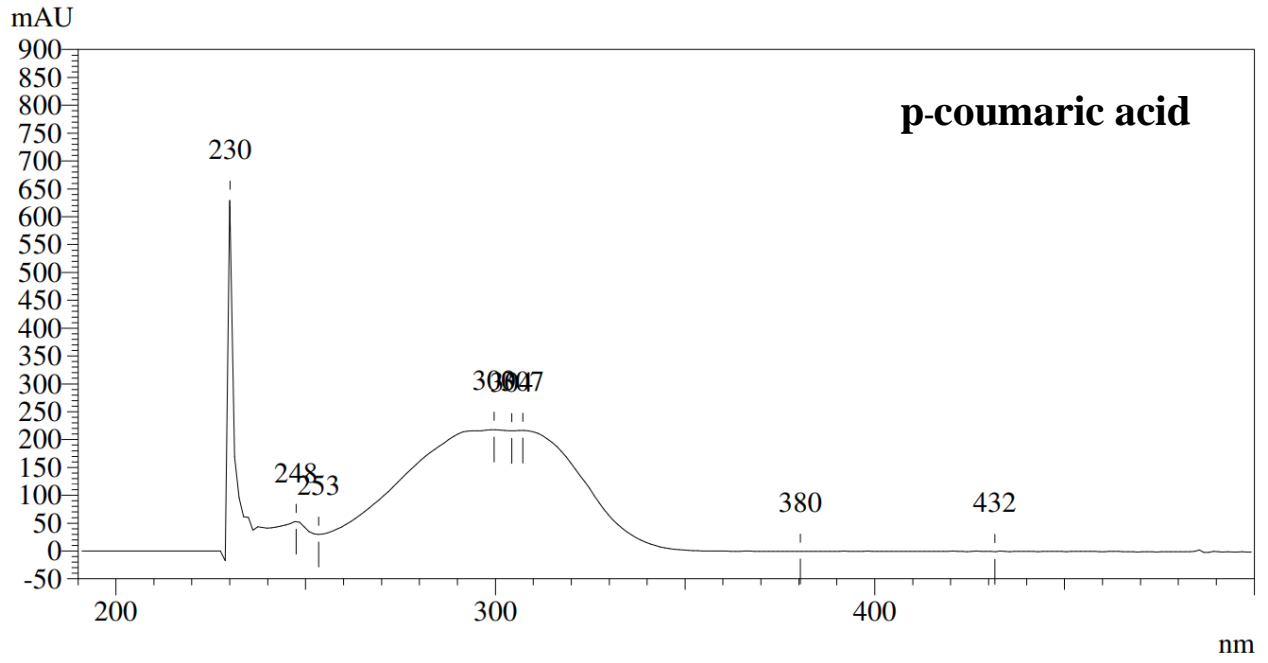

UV Spectrum

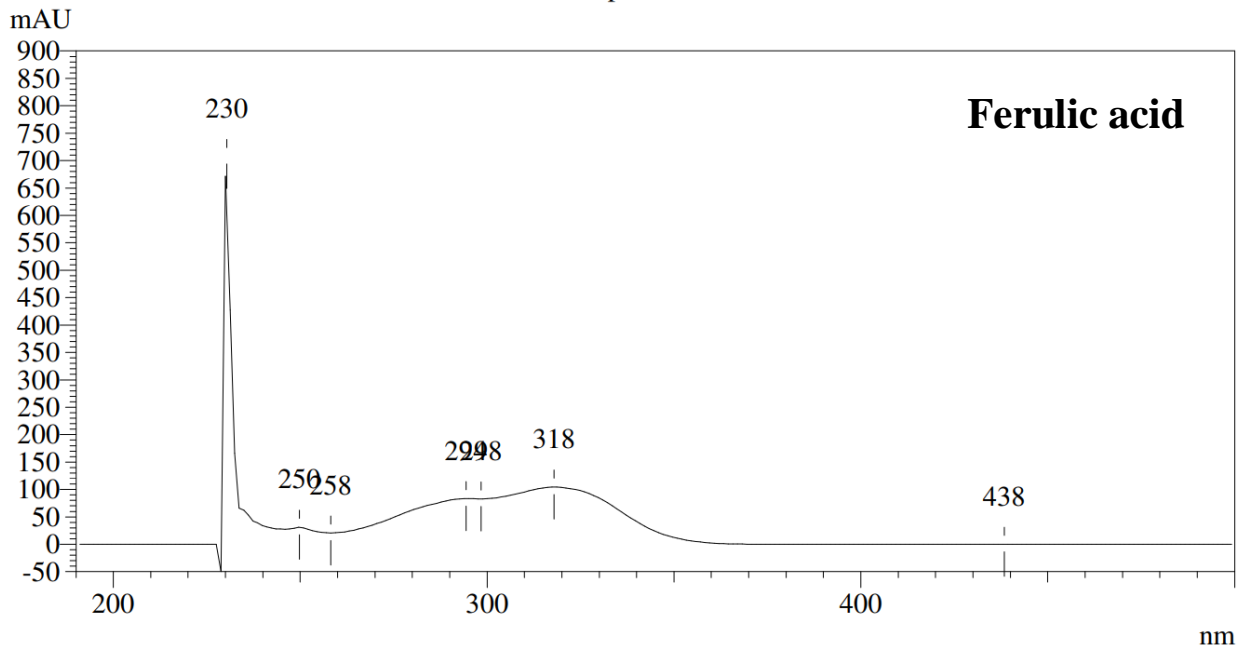

UV Spectrum

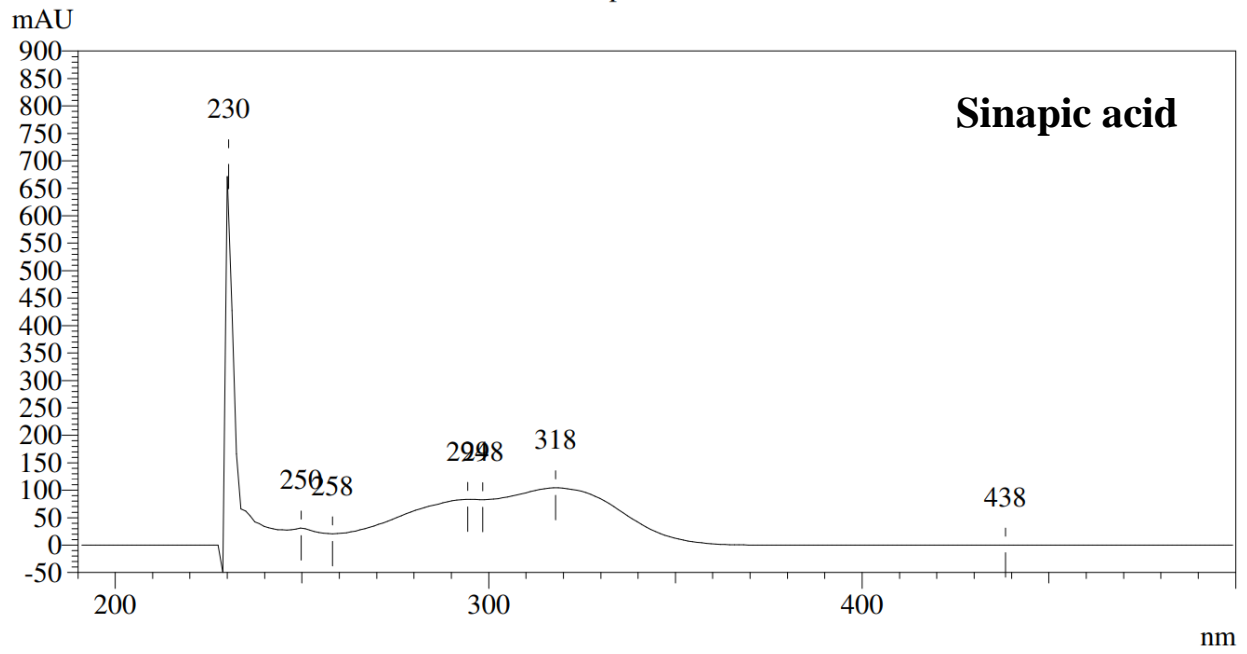

UV Spectrum

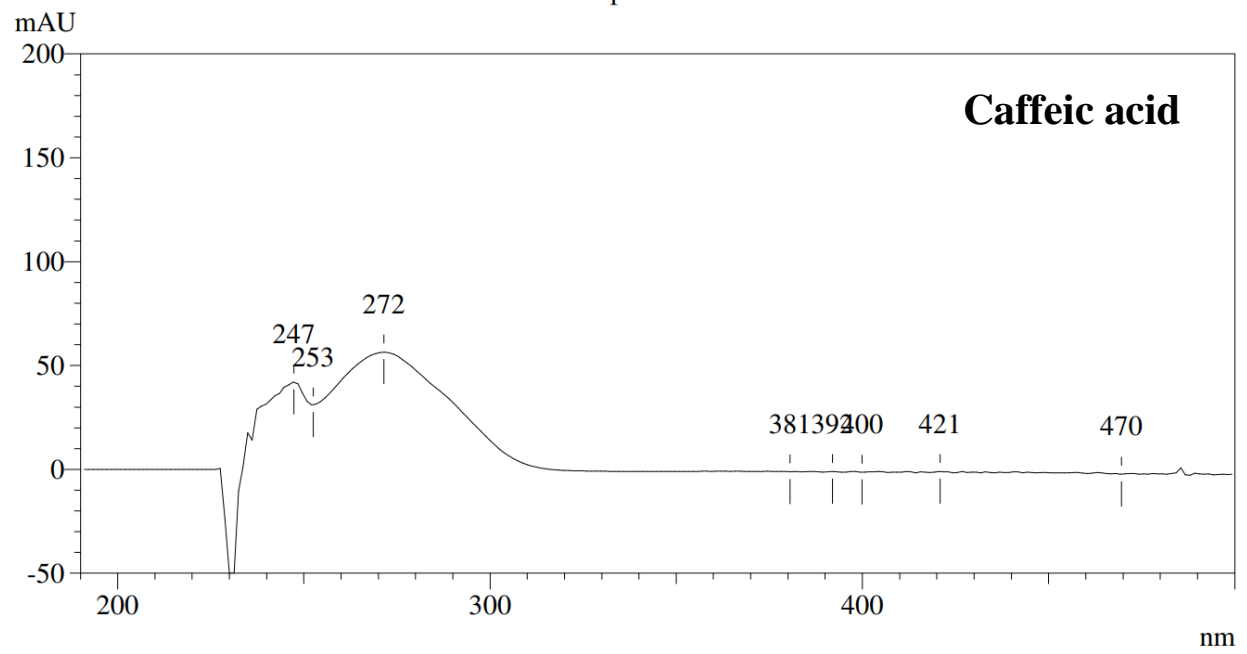

Supplement: Spectrum_of_phenolic_acid.pdf [file Spectrum_of_phenolic_acid.pdf]
